# Supplementary material for: Effects of improved complementary feeding and improved water, sanitation and hygiene on early child development among HIV-exposed children: substudy of a cluster randomised trial in rural Zimbabwe
Source: PubMed Central journal article supplement (PMC7042608; doi:10.1136/bmjgh-2019-001718), 2020-01-13
Supplement: bmjgh-2019-001718supp002.pdf [file bmjgh-2019-001718supp002.pdf]

**Supplementary Table 1: Baseline characteristics of mothers and infants who were enrolled and not enrolled into the early child development sub-study**

| Baseline characteristics                       | SOC              |                  |                | IYCF             |                  |                | WASH             |                  |                | WASH plus IYCF    |                  |                |
|------------------------------------------------|------------------|------------------|----------------|------------------|------------------|----------------|------------------|------------------|----------------|-------------------|------------------|----------------|
|                                                | Enrolled         | Not Enrolled     | <i>P</i> Value | Enrolled         | Not Enrolled     | <i>P</i> Value | Enrolled         | Not Enrolled     | <i>P</i> Value | Enrolled          | Not Enrolled     | <i>P</i> Value |
| Mothers                                        | 68               | 78               |                | 67               | 77               |                | 81               | 99               |                | 102               | 84               |                |
| Infants                                        | 68               | 78               |                | 68               | 79               |                | 83               | 101              |                | 104               | 86               |                |
| Mothers completing baseline visit <sup>1</sup> | 67               | 77               |                | 65               | 76               |                | 80               | 99               |                | 101               | 83               |                |
| <b>Household characteristics</b>               |                  |                  |                |                  |                  |                |                  |                  |                |                   |                  |                |
| Median number of occupants (IQR)               | 4.5 (3,6)        | 4 (3,5)          | 0.111          | 4 (3,6)          | 4 (3,6)          | 0.93           | 5 (3,6)          | 4 (3,6)          | 0.60           | 4 (3,6)           | 4 (3,6)          | 0.62           |
| Wealth Quintile <sup>2</sup>                   |                  |                  |                |                  |                  |                |                  |                  |                |                   |                  |                |
| 1 (Lowest)                                     | 16/66<br>(24.2%) | 22/77<br>(28.5%) | 0.0768         | 14/65<br>(21.5%) | 22/76<br>(29.0%) | 0.564          | 20/78<br>(25.6%) | 25/99<br>(25.3%) | 0.49           | 28/100<br>(28.0%) | 20/82<br>(24.4%) | 0.28           |
| 2                                              | 15/66<br>(22.7%) | 27/77<br>(35.1%) |                | 13/65<br>(20.0%) | 12/76<br>(15.8%) |                | 15/78<br>(19.3%) | 24/99<br>(24.2%) |                | 18/100<br>(18.0%) | 26/82<br>(31.7%) |                |
| 3                                              | 13/66<br>(19.7%) | 18/77<br>(23.4%) |                | 13/65<br>(20.0%) | 18/76<br>(23.7%) |                | 19/78<br>(24.4%) | 16/99<br>(16.2%) |                | 18/100<br>(18.0%) | 14/82<br>(17.1%) |                |
| 4                                              | 8/66<br>(12.1%)  | 6/77<br>(7.8%)   |                | 17/65<br>(26.2%) | 15/76<br>(19.7%) |                | 11/78<br>(14.1%) | 13/99<br>(13.1%) |                | 17/100<br>(17.0%) | 7/82 (8.5%)      |                |
| 5 (Highest)                                    | 14/66<br>(21.2%) | 4/77<br>(5.2%)   |                | 8/65<br>(12.3%)  | 9/76<br>(11.8%)  |                | 13/78<br>(16.7%) | 21/99<br>(21.2%) |                | 19/100<br>(19.0%) | 15/82<br>(18.3%) |                |
| <b>Electricity</b>                             |                  |                  |                |                  |                  |                |                  |                  |                |                   |                  |                |
| Connected to power grid                        | 3/66<br>(3.5%)   | 2/77<br>(2.6%)   | 0.524          | 3/65 (4.6%)      | 0/76<br>(0.0%)   | 0.0000         | 0/78 (0.0%)      | 3/99<br>(3.0%)   | 0.0000         | 4/100<br>(4.0%)   | 3/83 (3.6%)      | 0.891          |
| <i>Other power:</i>                            |                  |                  |                |                  |                  |                |                  |                  |                |                   |                  |                |
| Uses a generator                               | 2/66<br>(3.0%)   | 1/77<br>(1.3%)   | 0.074          | 3/65 (4.6%)      | 3/76<br>(4.0%)   | 0.98           | 0/78 (0.0%)      | 2/99<br>(2.0%)   | 0.0000         | 3/100<br>(3.0%)   | 2/83 (2.4%)      | 0.97           |
| Uses solar power                               | 45/66<br>(68.2%) | 42/77<br>(54.6%) |                | 44/65<br>(67.7%) | 52/76<br>(68.4%) |                | 56/78<br>(71.8%) | 62/99<br>(62.6%) |                | 64/100<br>(60.0%) | 53/83<br>(63.9%) |                |
| No electricity                                 | 19/66<br>(28.8%) | 34/77<br>(44.2%) |                | 18/65<br>(27.7%) | 21/76<br>(27.6%) |                | 22/78<br>(28.2%) | 35/99<br>(35.4%) |                | 33/100<br>(33.0%) | 28/83<br>(33.7%) |                |
| <b>Sanitation</b>                              |                  |                  |                |                  |                  |                |                  |                  |                |                   |                  |                |
| Household members defecate in the open         |                  |                  |                |                  |                  |                |                  |                  |                |                   |                  |                |
| Any latrine at household                       | 18/66<br>(27.3%) | 24/77<br>(31.2%) | 0.621          | 28/62<br>(45.2%) | 25/75<br>(33.3%) | 0.176          | 29/77<br>(37.7%) | 45/99<br>(45.5%) | 0.319          | 37/96<br>(38.5%)  | 31/82<br>(37.8%) | 0.926          |
| Improved latrine at household                  | 17/66<br>(25.8%) | 18/77<br>(23.4%) | 0.739          | 24/62<br>(38.7%) | 23/75<br>(30.7%) | 0.391          | 25/77<br>(32.5%) | 41/99<br>(41.4%) | 0.211          | 36/96<br>(37.5%)  | 24/81<br>(29.6%) | 0.254          |

|                                                             |                  |                  |       |                  |                   |        |                  |                  |        |                   |                  |        |
|-------------------------------------------------------------|------------------|------------------|-------|------------------|-------------------|--------|------------------|------------------|--------|-------------------|------------------|--------|
| Improved latrine with well-trodden path                     | 14/66<br>(21.2%) | 11/76<br>(14.5%) | 0.327 | 21/62<br>(33.9%) | 18/75<br>(24.0%)  | 0.214  | 23/77<br>(29.9%) | 29/99<br>(30.0%) | 0.921  | 25/96<br>(26.0%)  | 17/81<br>(21.0%) | 0.449  |
| Improved latrine with well-trodden path and not shared      | 12/64<br>(18.8%) | 7/73<br>(9.6%)   | 0.098 | 19/60<br>(31.7%) | 17/100<br>(17.0%) | 0.289  | 21/76<br>(27.6%) | 26/97<br>(26.8%) | 0.890  | 23/94<br>(24.5%)  | 12/76<br>(15.8%) | 0.157  |
| <b>Water</b>                                                |                  |                  |       |                  |                   |        |                  |                  |        |                   |                  |        |
| Main source of household drinking water is improved         | 41/66<br>(62.1%) | 46/77<br>(59.7%) | 0.766 | 36/62<br>(58.1%) | 46/75<br>(61.3%)  | 0.710  | 44/77<br>(57.1%) | 56/97<br>(57.7%) | 0.928  | 59/96<br>(61.5%)  | 52/82<br>(63.4%) | 0.782  |
| Treat drinking water to make it safer                       | 13/64<br>(20.3%) | 7/76<br>(9.2%)   | 0.107 | 11/62<br>(17.7%) | 8/72<br>(11.1%)   | 0.324  | 10/77<br>(13.0%) | 6/96<br>(6.3%)   | 0.173  | 13/96<br>(13.5%)  | 9/82<br>(11.0%)  | 0.601  |
| Median one-way walk time to fetch water (IQR), min          | 10 (5,20)        | 15 (5,30)        | 0.501 | 9 (3,15)         | 10 (5,15)         | 0.809  | 10 (5,15)        | 10 (5,30)        | 0.226  | 8.5 (5,20)        | 15 (5,20)        | 0.015  |
| Mean water volume collected per person in past 24 h (SD), L | 8.7 (5.0)        | 8.6 (4.8)        | 0.922 | 9.4 (6.7)        | 10.4 (6.9)        | 0.392  | 9.2 (6.6)        | 9.7 (7.7)        | 0.777  | 10.4 (7.5)        | 8.7 (5.6)        | 0.157  |
| <b>Hygiene</b>                                              |                  |                  |       |                  |                   |        |                  |                  |        |                   |                  |        |
| Handwashing station at household                            | 3/54<br>(5.6%)   | 1/69<br>(1.5%)   | 0.238 | 4/58 (6.5%)      | 4/71<br>(5.6%)    | 0.858  | 11/74<br>(14.9%) | 19/95<br>(20.0%) | 0.426  | 15/91<br>(16.5%)  | 7/78 (9.0%)      | 0.148  |
| Handwashing station with water                              | 1/54<br>(1.9%)   | 1/69<br>(1.5%)   | 0.865 | 0/60 (0.0%)      | 1/69<br>(1.5%)    | 0.000  | 4/74 (5.4%)      | 4/94<br>(4.3%)   | 0.748  | 2/91 (2.2%)       | 2/78 (2.6%)      | 0.878  |
| Handwashing station with water and rubbing agent            | 0/54<br>(0.0%)   | 0/69<br>(0.0%)   | -     | 0/60             | 0/69<br>(0.0%)    | -      | 0/74 (0.0%)      | 0/94<br>(0.0%)   | -      | 1/90 (1.1%)       | 0/78 (0.0%)      | -      |
| Improved floor <sup>3</sup>                                 | 28/68<br>(41.2%) | 24/78<br>(30.8%) | 0.183 | 32/67<br>(47.8%) | 33/77<br>(42.9%)  | 0.564  | 32/81<br>(39.5%) | 48/99<br>(48.5%) | 0.220  | 42/91<br>(46.1%)  | 38/84<br>(45.2%) | 0.565  |
| Median number of chickens (IQR)                             | 4 (1, 8)         | 4 (0, 10)        | 0.986 | 5.5 (2, 10.5)    | 4 (0, 8)          | .045   | 5 (3, 8)         | 4.5 (2, 10)      | 0.775  | 4 (1, 8)          | 5 (0, 8)         | 0.711  |
| Livestock observed inside home                              | 28/65<br>(43.1%) | 27/77<br>(35.1%) | 0.332 | 19/65<br>(29.2%) | 23/75<br>(30.7%)  | 0.858  | 34/78<br>(43.6%) | 33/97<br>(34.0%) | 0.165  | 33/99<br>(33.3%)  | 25/81<br>(30.9%) | 0.713  |
| Faeces observed in yard                                     | 25/68<br>(36.8%) | 28/78<br>(35.9%) | 0.919 | 17/67<br>(25.4%) | 22/77<br>(28.6%)  | 0.679  | 26/81<br>(32.1%) | 26/99<br>(26.35) | 0.401  | 17/102<br>(16.7%) | 23/84<br>(27.4%) | 0.072  |
| <b>Diet quality and food security</b>                       |                  |                  |       |                  |                   |        |                  |                  |        |                   |                  |        |
| Household meets minimum Dietary Diversity <sup>4</sup>      | 21/55<br>(38.2%) | 25/66<br>(37.9%) | 0.967 | 22/57<br>(38.6%) | 27/65<br>(41.5%)  | 0.772  | 24/73<br>(32.9%) | 31/84<br>(36.9%) | 0.610  | 37/83<br>(44.6%)  | 28/70<br>(40.0%) | 0.533  |
| Median Coping Strategies Index score <sup>5</sup> (IQR)     | 4 (0, 9.5)       | 3 (0, 9)         | 0.654 | 2 (0, 15)        | 2 (0, 14)         | 0.746  | 3 (0, 11)        | 0 (0, 9)         | 0.216  | 1 (0, 9)          | 3 (0, 10.5)      | 0.289  |
| <b>Maternal characteristics</b>                             |                  |                  |       |                  |                   |        |                  |                  |        |                   |                  |        |
| Mean age (SD), years                                        | 30.8 (6.1)       | 29.3 (6.4)       | 0.18  | 30.9 (6.4)       | 28.3 (5.8)        | 0.0169 | 30.4 (6.5)       | 27.3 (5.6)       | 0.0007 | 30.9 (5.8)        | 28.4 (6.0)       | 0.0017 |
| Mean height (SD), cm                                        | 161.2 (7.2)      | 161.2 (5.6)      | 0.90  | 160.2 (6.2)      | 160.1 (5.8)       | 0.89   | 160.5 (6.3)      | 160.4 (6.5)      | 0.94   | 159.0 (6.2)       | 159.8 (5.3)      | 0.33   |

|                                                        |               |               |        |               |               |        |               |                |        |                |               |        |
|--------------------------------------------------------|---------------|---------------|--------|---------------|---------------|--------|---------------|----------------|--------|----------------|---------------|--------|
| Mean mid-upper arm circumference (SD), cm              | 26.8 (3.5)    | 26.1 (3.0)    | 0.125  | 26.3 (3.3)    | 26.1 (2.4)    | 0.669  | 26.4 (2.9)    | 26.4 (2.6)     | 0.99#  | 26.4 (2.9)     | 25.9 (2.6)    | 0.097  |
| Mean years of completed schooling (SD), years          | 9.5 (1.9)     | 9.4 (2.1)     | 0.852  | 9.0 (2.1)     | 9.0 (2.3)     | 0.946  | 8.7 (2.3)     | 9.1 (2.2)      | 0.137  | 9.3 (1.7)      | 9.2 (2.0)     | 0.748  |
| Positive microscopy for <i>Schistosoma haematobium</i> | 6/67 (9.0%)   | 6/68 (8.8%)   | 0.98   | 4/64 (6.3%)   | 5/72 (6.9%)   | 0.858  | 12/78 (15.4%) | 8/90 (8.9%)    | 0.237  | 9/101 (8.9%)   | 10/74 (13.5%) | 0.409  |
| Median parity (IQR)                                    | 3 (1, 3)      | 2 (1, 3)      | 0.041  | 2 (1, 3)      | 2 (1, 3)      | 0.605  | 3 (2, 4)      | 2 (1, 3)       | 0.002  | 2 (1, 3)       | 2 (1, 3)      | 0.839  |
| Married                                                | 61/64 (95.3%) | 67/72 (93.1%) | 0.587  | 59/63 (93.7%) | 71/75 (94.7%) | 0.835  | 71/73 (97.3%) | 90/96 (93.8%)  | 0.365  | 85/92 (92.0%)  | 75/80 (93.8%) | 0.774  |
| Employed                                               | 5/65 (7.7%)   | 9/76 (11.8%)  | 0.393  | 5/65 (7.7%)   | 8/76 (10.5%)  | 0.563  | 8/78 (10.3%)  | 12/99 (12.1%)  | 0.690  | 8/100 (8.0%)   | 3/83 (3.6%)   | 0.266  |
| Religion:                                              |               |               |        |               |               |        |               |                |        |                |               |        |
| Apostolic                                              | 34/68 (50.0%) | 31/78 (39.7%) | 0.37   | 32/67 (47.8%) | 29/77 (37.7%) | 0.27   | 34/81 (42.0%) | 47/99 (47.5%)  | 0.50   | 46/102 (45.1%) | 40/84 (47.6%) | 0.72   |
| Other Christian                                        | 25/68 (36.8%) | 34/78 (43.6%) |        | 25/67 (37.3%) | 38/77 (49.4%) |        | 30/81 (37.0%) | 38/99 (38.4%)  |        | 41/102 (40.2%) | 35/84 (41.7%) |        |
| Other                                                  | 9/68 (13.2%)  | 13/78 (16.7%) |        | 10/67 (14.9%) | 10/77 (13.0%) |        | 17/81 (21.0%) | 14/99 (14.1%)  |        | 15/102 (14.7%) | 9/84 (10.7%)  |        |
| <b>Infant characteristics</b>                          |               |               |        |               |               |        |               |                |        |                |               |        |
| Female                                                 | 33/68 (48.5%) | 37/78 (47.4%) | 0.90   | 32/68 (47.1%) | 39/79 (49.4%) | 0.77   | 40/83 (48.2%) | 51/101 (50.1%) | 0.77   | 55/104 (52.9%) | 49/86 (57.0%) | 0.66   |
| Mean birth weight (SD), kg                             | 3.03 (0.48)   | 3.04 (0.50)   | 0.819  | 2.93 (0.49)   | 3.03 (0.45)   | 0.243  | 3.04 (0.51)   | 2.99 (0.47)    | 0.532  | 3.00 (0.50)    | 2.94 (0.45)   | 0.237  |
| Birth weight <2500 g                                   | 8/67 (11.9%)  | 8/69 (11.6%)  | 0.953  | 10/66 (15.2%) | 7/72 (9.7%)   | 0.423  | 6/78 (7.7%)   | 13/86 (15.1%)  | 0.180  | 11/101 (10.9%) | 9/71 (12.7%)  | 0.666  |
| Institutional delivery                                 | 59/64 (92.2%) | 53/70 (75.7%) | 0.0078 | 55/67 (82.1%) | 61/73 (83.6%) | 0.81   | 69/81 (85.2%) | 78/90 (86.7%)  | 0.757  | 87/94 (92.6%)  | 57/77 (74.0%) | 0.0009 |
| Vaginal delivery                                       | 62/66 (93.9%) | 66/70 (94.3%) | 0.931  | 58/66 (87.9%) | 70/72 (97.2%) | 0.0619 | 78/82 (95.1%) | 82/92 (89.1%)  | 0.1130 | 92/100 (92.0%) | 68/77 (88.3%) | 0.394  |

<sup>1</sup> Baseline variables presented for mothers who had live births; maternal and household data were collected about 2 weeks after consent (~14 weeks gestation); this gap created opportunity for loss to follow-up between consent and baseline, thus the number of mothers completing baseline visit is smaller than the number of mothers with live births. Baseline for infants was at birth. Values are %, unless noted. For variables where [n] is not stated, <3% of data are missing based on number of baseline visits completed.

<sup>2</sup> Chasekwa B, Maluccio JA, Ntozini R, Moulton LH, Wu F, Smith LE, et al. Measuring wealth in rural communities: Lessons from the Sanitation, Hygiene, Infant Nutrition Efficacy (SHINE) trial. *PLoS ONE*. 2018; 13(6): e0199393.

<sup>3</sup> Improved floor defined as concrete, brick, cement, or tile. Unimproved floor defined as mud, earth, sand, or dung.

<sup>4</sup> FAO, FHI 360. Minimum Dietary Diversity for Women: A Guide for Measurement. Rome: FAO. 2016.

<sup>5</sup> Maxwell D, Watkins B, Wheeler R, Collins G. The Coping Strategy Index: A tool for rapid measurement of household food security and the impact of food aid programs in humanitarian emergencies. CARE and WFP, Nairobi. 2003.

SD: standard deviation; IQR: interquartile range; MUAC: Mid-upper arm circumference
