# Supplementary material for: Effects of improved complementary feeding and improved water, sanitation and hygiene on early child development among HIV-exposed children: substudy of a cluster randomised trial in rural Zimbabwe
Source: PubMed Central journal article supplement (PMC7042608; doi:10.1136/bmjgh-2019-001718), 2020-01-13
Supplement: bmjgh-2019-001718supp003.pdf [file bmjgh-2019-001718supp003.pdf]

**Supplementary Table 2: Effect of WASH and IYCF interventions on Early Child Development outcomes at 24 months in female and male children**

| CONTINUOUS OUTCOMES                         | Treatment group | Female children |                 | Male children |                 | Difference between means (95% CI) | P     |
|---------------------------------------------|-----------------|-----------------|-----------------|---------------|-----------------|-----------------------------------|-------|
|                                             |                 | N               | Mean score (SD) | N             | Mean score (SD) |                                   |       |
| Malawi Developmental Assessment (MDAT) Tool | SOC             | 32              | 90.2 (8.7)      | 34            | 91.7 (7.7)      | 1.46 (-2.68, 5.59)                | 0.490 |
|                                             | IYCF            | 30              | 91.6 (9.7)      | 36            | 91.8 (7.7)      | 0.26 (-4.18, 4.70)                | 0.909 |
|                                             | WASH            | 40              | 89.4 (9.3)      | 43            | 89.9 (9.1)      | 0.23 (-2.61, 3.07)                | 0.872 |
|                                             | IYCF+WASH       | 55              | 93.3 (7.5)      | 48            | 97.1 (9.9)      | 3.92 (-0.35, 8.18)                | 0.072 |
| MacArthur Bates CDI (Vocabulary)            | SOC             | 32              | 61.7 (16.0)     | 34            | 51.7 (19.6)     | 8.88 (0.64, 17.1)                 | 0.035 |
|                                             | IYCF            | 30              | 60.2 (22.5)     | 35            | 55.3 (20.3)     | 4.75 (-3.09, 12.6)                | 0.235 |
|                                             | WASH            | 39              | 56.8 (20.5)     | 40            | 59.4 (20.0)     | -2.56 (-10.5, 5.35)               | 0.526 |
|                                             | IYCF+WASH       | 52              | 67.8 (15.5)     | 47            | 62.0 (18.2)     | 5.85 (-2.10, 13.8)                | 0.149 |
| A-not-B Test (object permanence)            | SOC             | 28              | 7.9 (1.2)       | 27            | 7.9 (1.5)       | -0.03 (-0.66, 0.59)               | 0.920 |
|                                             | IYCF            | 30              | 7.7 (1.3)       | 32            | 7.6 (1.4)       | -0.01 (-0.63, 0.66)               | 0.972 |
|                                             | WASH            | 37              | 7.7 (1.8)       | 39            | 7.9 (1.2)       | -0.14 (-0.78, 0.49)               | 0.656 |
|                                             | IYCF+WASH       | 52              | 7.8 (1.3)       | 42            | 7.7 (1.3)       | 0.17 (-0.39, 0.74)                | 0.546 |
| DICHOTOMOUS OUTCOMES                        | Treatment group | N               | n (%)           | N             | n (%)           | Unadjusted Relative Risk (95% CI) | P     |
| Self-control Task (Hidden)                  | SOC             | 30              | 25 (55.6%)      | 32            | 20 (44.4%)      | 1.33 (0.99, 1.79)                 | 0.058 |
|                                             | IYCF            | 30              | 17 (41.5%)      | 36            | 24 (58.5%)      | 0.85 (0.59, 1.22)                 | 0.378 |
|                                             | WASH            | 39              | 23 (46.0%)      | 43            | 27 (54.0%)      | 0.94 (0.70, 1.26)                 | 0.672 |
|                                             | IYCF+WASH       | 54              | 37 (53.6%)      | 48            | 32 (46.4%)      | 1.03 (0.73, 1.44)                 | 0.874 |
| Self-control Task (Unhidden)                | SOC             | 30              | 21 (67.7%)      | 31            | 10 (32.3%)      | 2.23 (1.32, 3.78)                 | 0.003 |
|                                             | IYCF            | 30              | 12 (38.7%)      | 36            | 19 (61.3%)      | 0.76 (0.46, 1.25)                 | 0.280 |
|                                             | WASH            | 38              | 17 (53.1%)      | 43            | 15 (46.9%)      | 1.26 (0.75, 2.09)                 | 0.380 |
|                                             | IYCF+WASH       | 52              | 26 (55.3%)      | 48            | 21 (44.7%)      | 1.11 (0.76, 1.62)                 | 0.593 |
