# Supplementary material for: Effects of improved complementary feeding and improved water, sanitation and hygiene on early child development among HIV-exposed children: substudy of a cluster randomised trial in rural Zimbabwe
Source: PubMed Central journal article supplement (PMC7042608; doi:10.1136/bmjgh-2019-001718), 2020-01-13
Supplement: bmjgh-2019-001718supp004.pdf [file bmjgh-2019-001718supp004.pdf]

**Supplementary Table 3: Effect of WASH and IYCF interventions on Early Child Development outcomes at 24 months in HIV-exposed uninfected and HIV-unexposed children**

| CONTINUOUS OUTCOMES                         | Treatment group | HIV-exposed uninfected |                 | HIV-unexposed |                 | Difference between means (95% CI) | P     |
|---------------------------------------------|-----------------|------------------------|-----------------|---------------|-----------------|-----------------------------------|-------|
|                                             |                 | N                      | Mean score (SD) | N             | Mean score (SD) |                                   |       |
| Malawi Developmental Assessment (MDAT) Tool | SOC             | 63                     | 90.7 (8.1)      | 373           | 92.7 (9.5)      | -1.80 (-3.70, 0.10)               | 0.063 |
|                                             | IYCF            | 63                     | 91.8 (8.6)      | 389           | 93.0 (8.6)      | -1.02 (-3.01, 0.97)               | 0.315 |
|                                             | WASH            | 79                     | 89.6 (9.2)      | 406           | 91.6 (9.2)      | -1.90 (-3.79, -0.01)              | 0.048 |
|                                             | IYCF+WASH       | 95                     | 95.5 (9.0)      | 433           | 93.8 (9.2)      | 1.50 (-0.05, 3.04)                | 0.057 |
| MacArthur Bates CDI (Vocabulary)            | SOC             | 63                     | 56.9 (18.3)     | 365           | 61.3 (18.7)     | -4.24 (-8.27, -0.22)              | 0.039 |
|                                             | IYCF            | 62                     | 58.4 (20.7)     | 375           | 61.3 (18.6)     | -2.73 (-8.60, 3.14)               | 0.362 |
|                                             | WASH            | 75                     | 58.4 (18.9)     | 397           | 61.1 (19.1)     | -2.70 (-7.28, 1.87)               | 0.247 |
|                                             | IYCF+WASH       | 91                     | 66.0 (15.9)     | 423           | 63.3 (18.8)     | 2.55 (-0.91, 6.02)                | 0.148 |
| A-not-B Test (object permanence)            | SOC             | 52                     | 7.8 (1.3)       | 351           | 7.8 (1.3)       | 0.02 (-0.40, 0.43)                | 0.943 |
|                                             | IYCF            | 59                     | 7.6 (1.3)       | 364           | 7.7 (1.4)       | -0.10 (-0.43, 0.23)               | 0.546 |
|                                             | WASH            | 72                     | 7.8 (1.5)       | 372           | 7.7 (1.4)       | 0.05 (-0.30, 0.39)                | 0.784 |
|                                             | IYCF+WASH       | 86                     | 7.7 (1.3)       | 404           | 7.9 (1.4)       | -0.14 (-0.52, 0.23)               | 0.459 |
| DICHOTOMOUS OUTCOMES                        | Treatment group | N                      | n (%)           | N             | n (%)           | Unadjusted Relative Risk (95% CI) | P     |
| Self-control Task (Hidden)                  | SOC             | 59                     | 43 (72.9%)      | 365           | 237 (64.9%)     | 1.13 (0.96, 1.34)                 | 0.129 |
|                                             | IYCF            | 63                     | 39 (61.9%)      | 383           | 245 (64.0%)     | 0.96 (0.78, 1.20)                 | 0.744 |
|                                             | WASH            | 78                     | 47 (60.3%)      | 396           | 252 (63.6%)     | 0.94 (0.77, 1.16)                 | 0.573 |
|                                             | IYCF+WASH       | 94                     | 65 (69.2%)      | 432           | 283 (65.5%)     | 1.06 (0.93, 1.20)                 | 0.415 |
| Self-control Task (Unhidden)                | SOC             | 58                     | 31 (53.5%)      | 359           | 170 (47.4%)     | 1.13 (0.87, 1.47)                 | 0.346 |
|                                             | IYCF            | 63                     | 29 (46.0%)      | 381           | 172 (45.2%)     | 1.02 (0.77, 1.34)                 | 0.895 |
|                                             | WASH            | 77                     | 30 (39.0%)      | 394           | 173 (43.9%)     | 0.89 (0.68, 1.16)                 | 0.383 |
|                                             | IYCF+WASH       | 92                     | 43 (46.7%)      | 429           | 201 (46.9%)     | 1.00 (0.81, 1.23)                 | 0.998 |
